# Supplementary material
Source: PubMed Central journal article supplement (PMC2576147)
Supplement: 90339.2008_1.pdf [file 90339.2008_1.pdf]

**Supplementary Figure 1.** Immunofluorescence staining on rat inner medullas using antibodies against the ERK1/2 MAP kinase pathway components and AQP2. See a list of antibodies used in Supplementary Table 1.

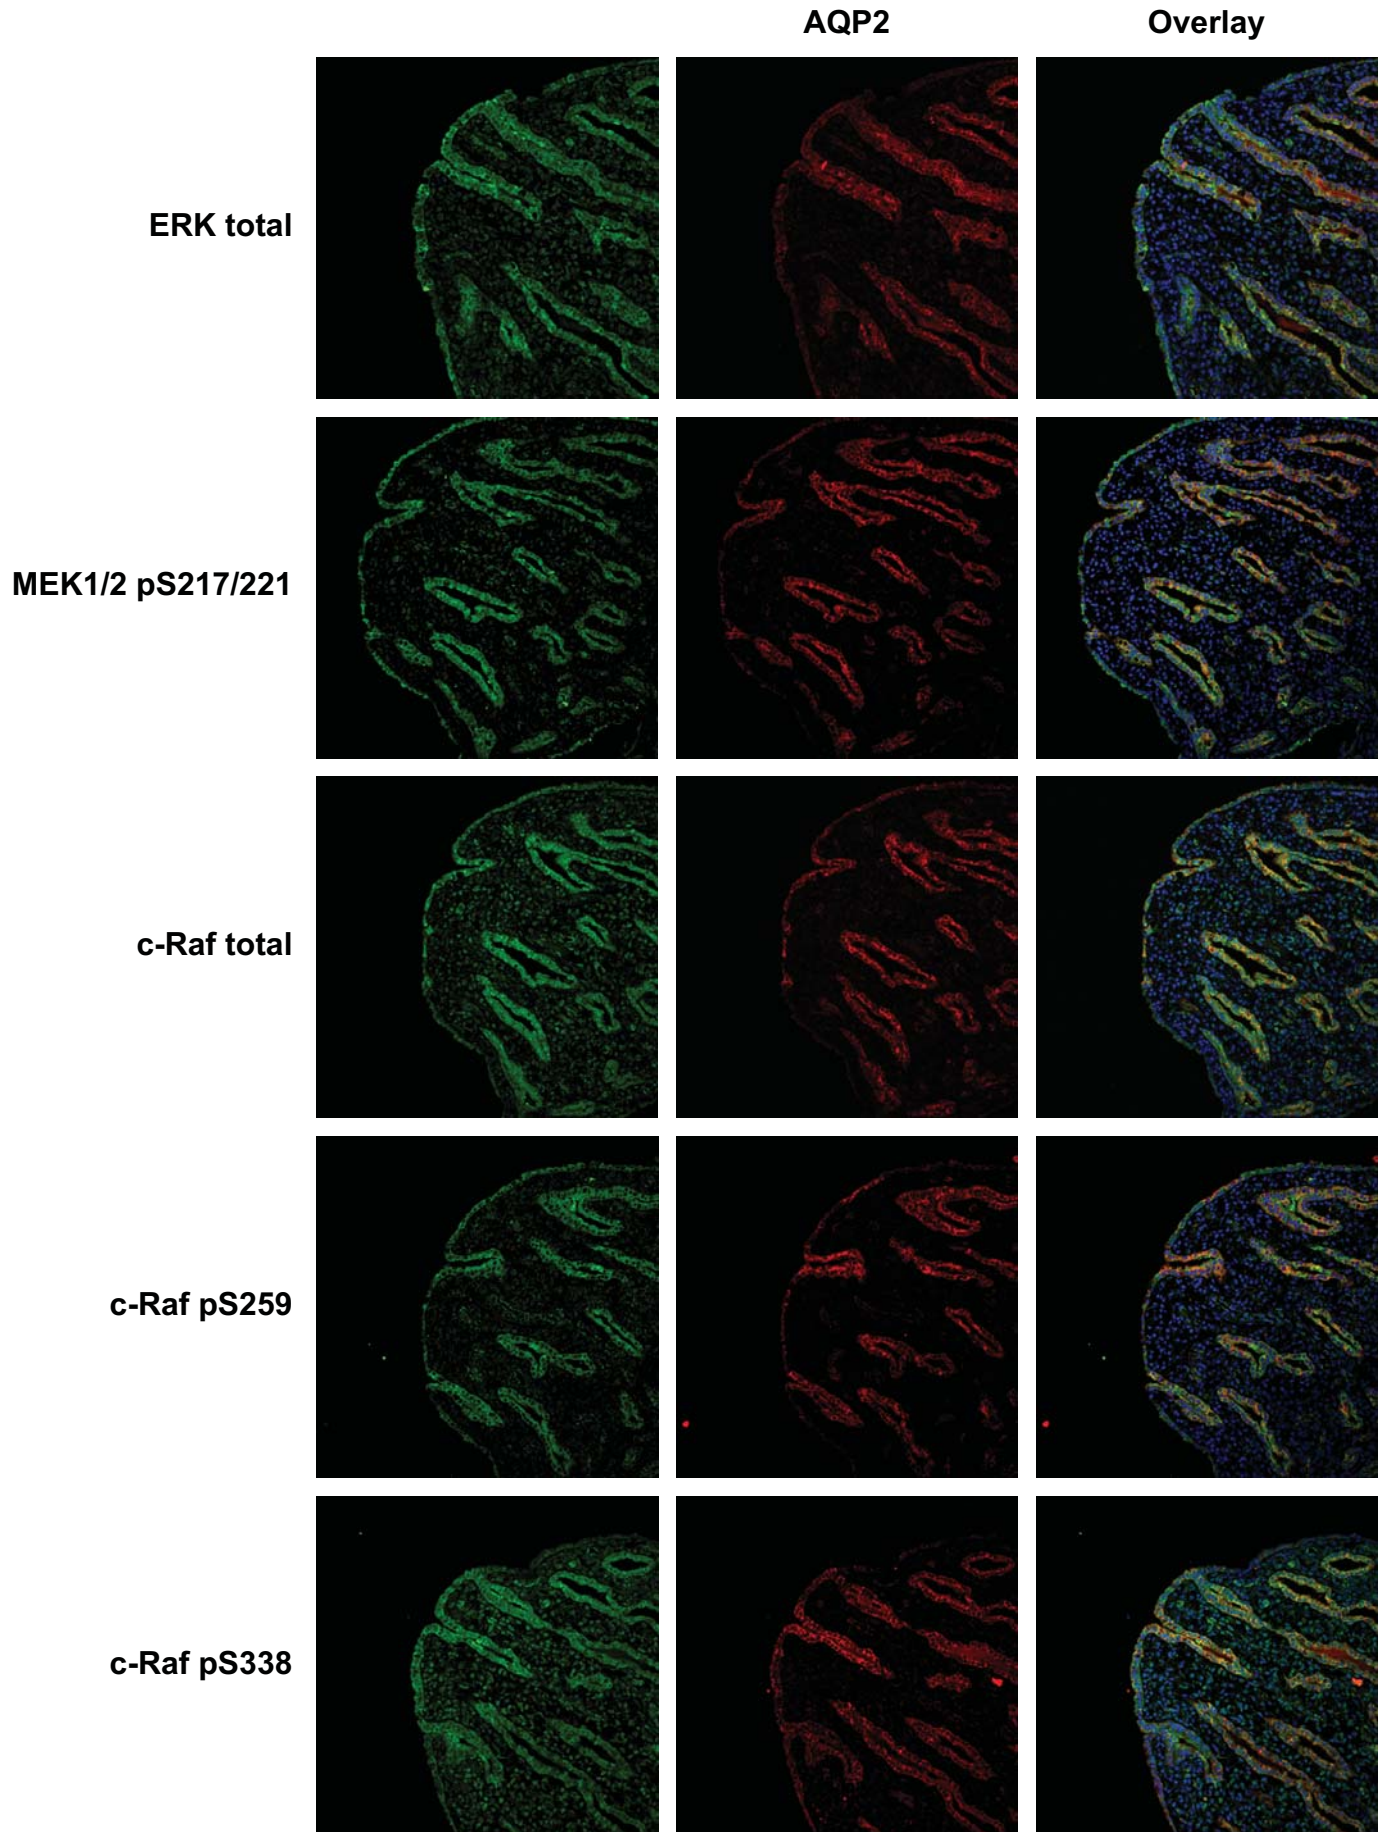

**Supplementary Figure 2. EGF effects on p38 MAPK and JNK activation.**  
0.1  $\mu$ M EGF did not alter p38 MAPK phosphorylation at T180 and Y182 (A),  
JNK1 phosphorylation at T183 and Y185 (B), or JNK2/3 phosphorylation at T183 and Y185 (C).

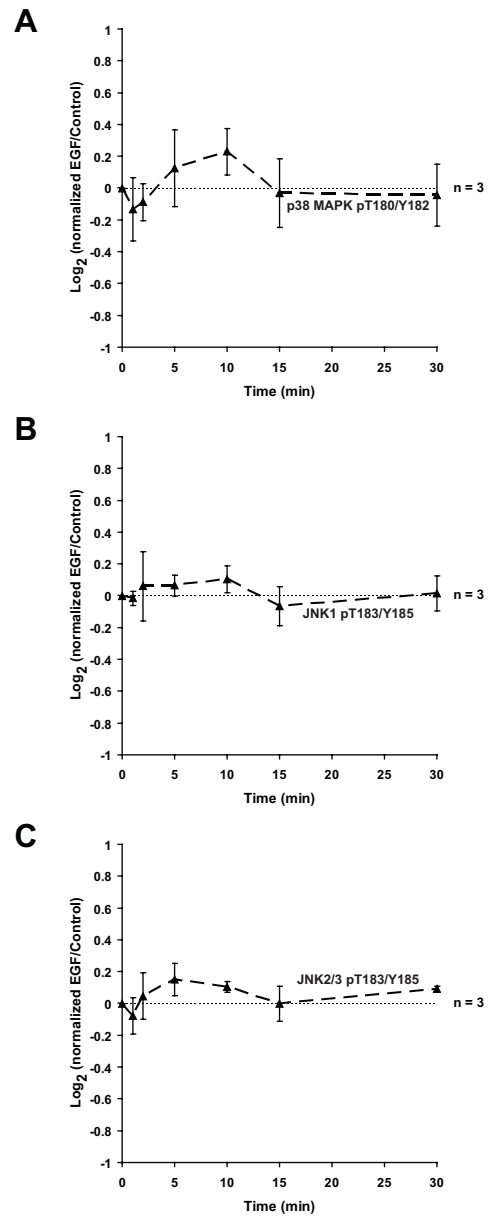

**Supplementary Figure 3.** Immunofluorescence staining on rat inner medullas using antibodies against Akt, PI3K p110 $\gamma$ , and AQP2. See a list of antibodies used in Supplementary Table 1.

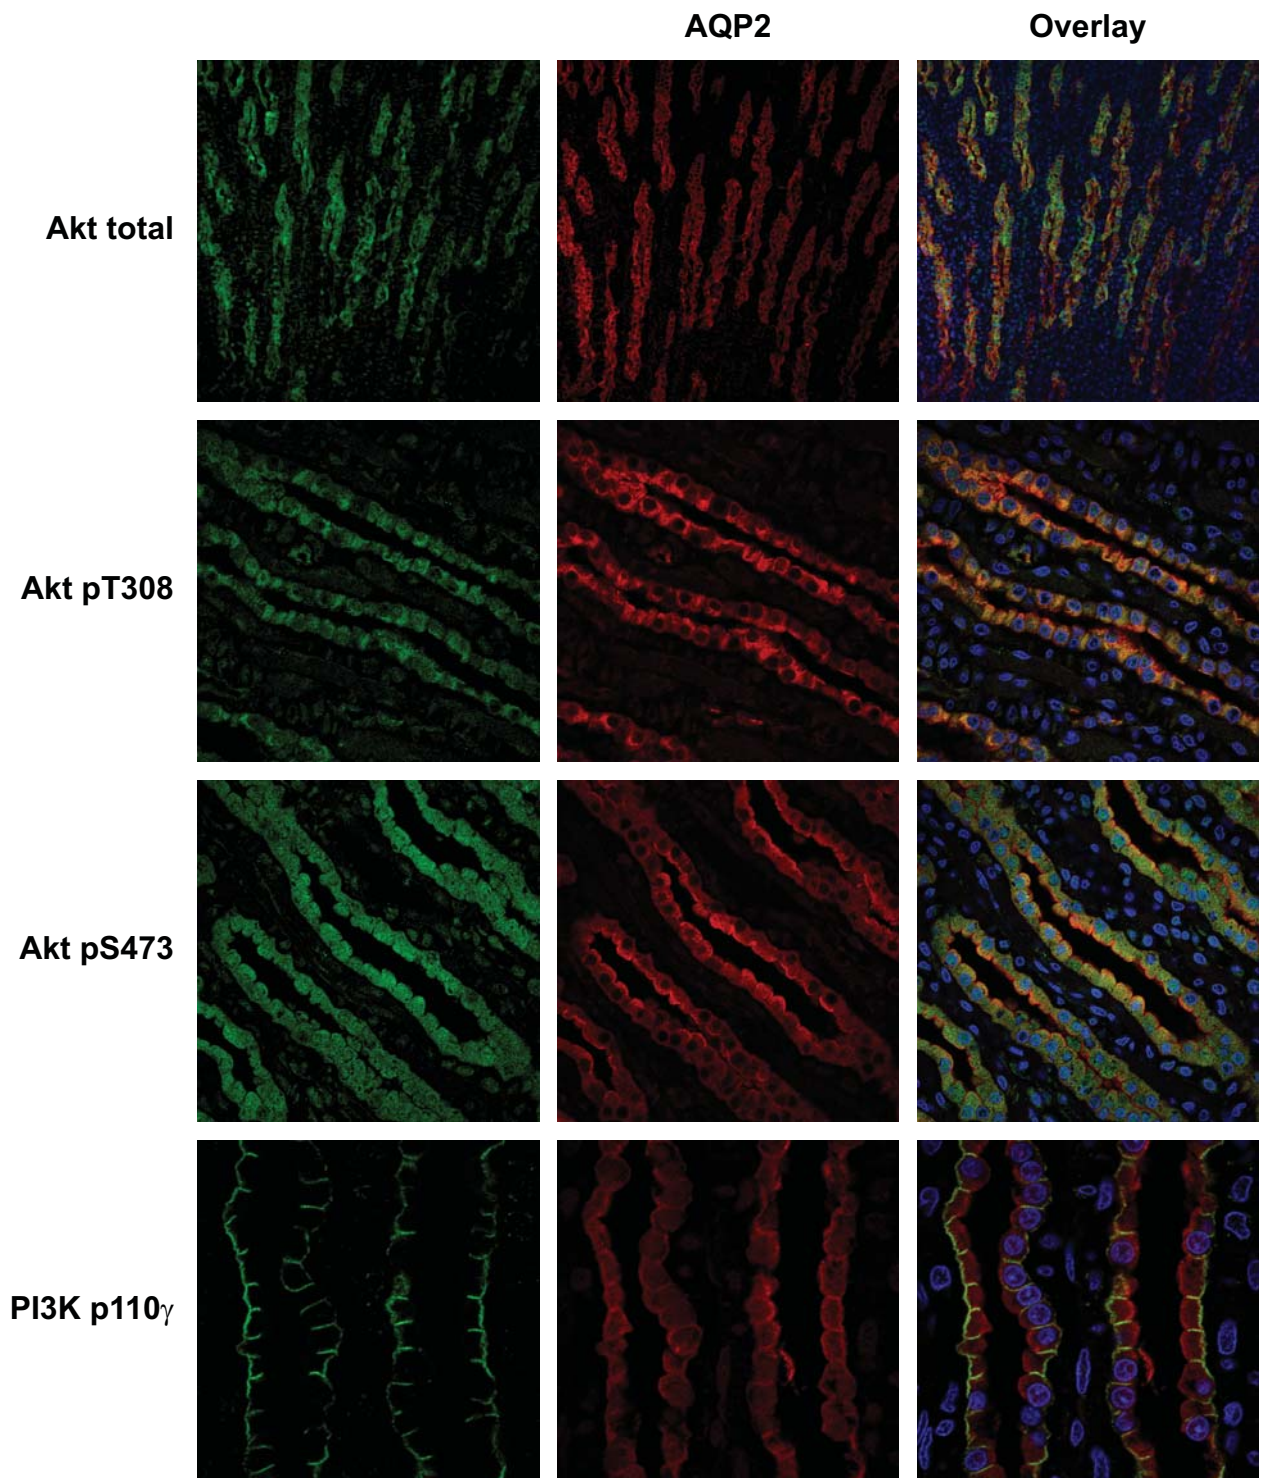

### Supplementary Figure 4. dDAVP effects on known Akt substrates.

1 nM dDAVP did not alter GSK-3 $\alpha$  phosphorylation at S21 (A), GSK-3 $\beta$  phosphorylation at S9 (B), Bad phosphorylation at S112 (C) and S136 (D), TSC2 phosphorylation at S939 (E) and T1462 (F), MDM2 phosphorylation at S166 (G), and FoxO1 phosphorylation at S256 (H).

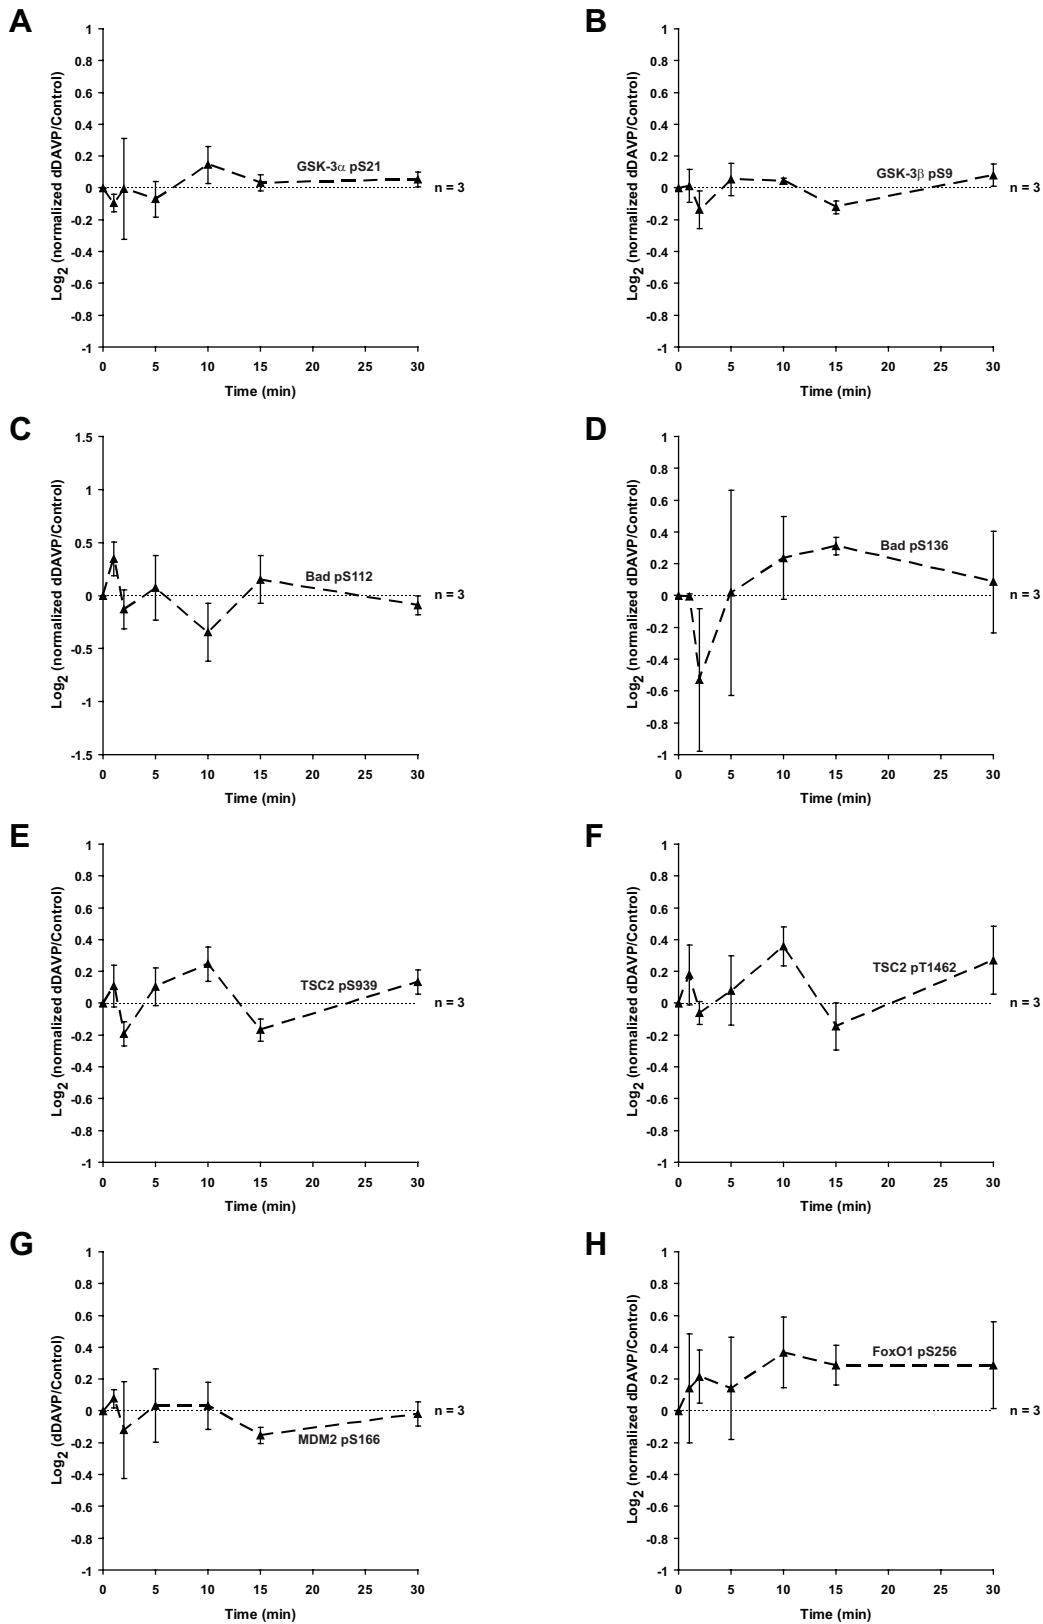



**Supplementary Figure 5. Effects of PI3K inhibition on ERK1/2 and MEK1/2 phosphorylation.**

IMCD suspensions were preincubated for 25 min in the absence or presence of 25  $\mu$ M LY294002 and then incubated with vehicle or 1 nM dDAVP for 5 min. ‡ = statistically significant versus dDAVP alone.

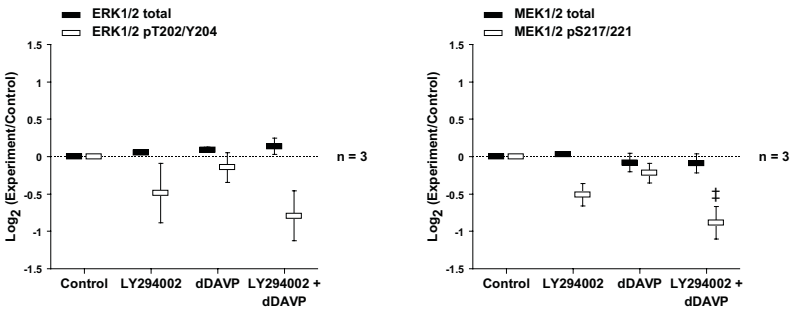

**Supplementary Table 1.** A list of the antibodies used in the present study.

| Antibody                        | Catalog # | Species | Type       | Source                                       |
|---------------------------------|-----------|---------|------------|----------------------------------------------|
| AQP2 total                      | LL265     | Chicken | Polyclonal | Our laboratory (1)                           |
| AQP2 pS256                      | AN244     | Rabbit  | Polyclonal | A gift from Søren Nielsen (3)                |
| AQP2 pS261                      | 5231      | Rabbit  | Polyclonal | Our laboratory (2)                           |
| Akt total                       | 9272      | Rabbit  | Polyclonal | Cell Signaling Technology, Inc., Danvers, MA |
| Akt total (IF)                  | 4685      | Rabbit  | Monoclonal |                                              |
| Akt pT308                       | 9275      | Rabbit  | Polyclonal |                                              |
| Akt pT308 (IF)                  | 9266      | Rabbit  | Monoclonal |                                              |
| Akt pS473                       | 9271      | Rabbit  | Polyclonal |                                              |
| Akt pS473 (IF)                  | 3787      | Rabbit  | Monoclonal |                                              |
| Phospho-(Ser/Thr) Akt Substrate | 9614      | Rabbit  | Monoclonal |                                              |
| ERK1/2 total                    | 9102      | Rabbit  | Polyclonal |                                              |
| ERK1/2 pT202/Y204               | 9106      | Mouse   | Monoclonal |                                              |
| MEK1/2 total                    | 4694      | Mouse   | Monoclonal |                                              |
| MEK1/2 pS217/221                | 9121      | Rabbit  | Polyclonal |                                              |
| c-Raf total                     | 9422      | Rabbit  | Polyclonal |                                              |
| c-Raf pS259                     | 9421      | Rabbit  | Polyclonal |                                              |
| c-Raf pS338                     | 9427      | Rabbit  | Monoclonal |                                              |
| p38 MAPK total                  | 9228      | Mouse   | Monoclonal |                                              |
| p38 MAPK pT180/Y182             | 9216      | Mouse   | Monoclonal |                                              |
| JNK total                       | 9258      | Rabbit  | Monoclonal |                                              |
| JNK pT183/Y185                  | 9255      | Mouse   | Monoclonal |                                              |
| GSK-3 $\alpha$ total            | 9338      | Rabbit  | Polyclonal |                                              |
| GSK-3 $\alpha$ pS21             | 9331      | Rabbit  | Polyclonal |                                              |
| GSK-3 $\beta$ total             | 9315      | Rabbit  | Monoclonal |                                              |
| GSK-3 $\beta$ pS9               | 9331      | Rabbit  | Polyclonal |                                              |
| Bad total                       | 9292      | Rabbit  | Polyclonal |                                              |
| Bad pS112                       | 9291      | Rabbit  | Polyclonal |                                              |
| Bad pS136                       | 9295      | Rabbit  | Polyclonal |                                              |
| TSC2 total                      | 3635      | Rabbit  | Monoclonal |                                              |
| TSC2 pS939                      | 3615      | Rabbit  | Polyclonal |                                              |
| TSC2 pT1462                     | 3617      | Rabbit  | Monoclonal |                                              |
| MDM2 pS166                      | 3521      | Rabbit  | Polyclonal |                                              |
| FoxO1 total                     | 9462      | Rabbit  | Polyclonal |                                              |
| FoxO1 pS256                     | 9461      | Rabbit  | Polyclonal |                                              |
| PI3K p110 $\gamma$              | 4252      | Rabbit  | Polyclonal |                                              |

## Reference List

1. **Barile M, Pisitkun T, Yu MJ, Chou CL, Verbalis MJ, Shen RF and Knepper MA.** Large Scale Protein Identification in Intracellular Aquaporin-2 Vesicles from Renal Inner Medullary Collecting Duct. *Mol Cell Proteomics* 4: 1095-1106, 2005.
2. **Hoffert JD, Nielsen J, Yu MJ, Pisitkun T, Schleicher SM, Nielsen S and Knepper MA.** Dynamics of aquaporin-2 serine-261 phosphorylation in response to short-term vasopressin treatment in collecting duct. *Am J Physiol Renal Physiol* 292: F691-F700, 2007.
3. **Nishimoto G, Zelenina M, Li D, Yasui M, Aperia A, Nielsen S and Nairn AC.** Arginine vasopressin stimulates phosphorylation of aquaporin-2 in rat renal tissue. *American Journal of Physiology* 276: F254-F259, 1999.

**Supplementary Table 2.** A list of the interactions between parent nodes and child nodes in the network diagram of vasopressin signaling in the IMCD (Figure 16).

| Parent node           | Interaction                             | Child node            | Reference           |
|-----------------------|-----------------------------------------|-----------------------|---------------------|
| AVP                   | directly activates                      | AVPR2                 | (2)                 |
| AVPR2                 | indirectly activates                    | RYR1                  | (9)                 |
| AVPR2                 | directly activates                      | ARRB1                 | (25)                |
| AVPR2                 | directly activates                      | GNAS                  | (17)                |
| AVPR2                 | directly activates                      | G $\beta$ /G $\gamma$ | (17)                |
| RYR1                  | directly releases                       | Ca $^{++}$            | (32)                |
| ARRB1                 | hypothetically activates                | PI3K                  | Present study, (24) |
| GNAS                  | directly activates                      | ADCY3                 | (26)                |
| GNAS                  | directly activates                      | ADCY6                 | (26)                |
| GNAS                  | hypothetically activates                | PI3K                  | Present study       |
| G $\beta$ /G $\gamma$ | hypothetically activates                | PI3K                  | Present study, (27) |
| Ca $^{++}$            | directly activates                      | RYR1                  | (32)                |
| Ca $^{++}$            | directly activates                      | CALM                  | (31)                |
| Ca $^{++}$            | directly inhibits                       | ADCY6                 | (4)                 |
| Ca $^{++}$            | hypothetically activates                | PI3K                  | Present study, (29) |
| ADCY3                 | directly catalyzes the formation of     | cAMP                  | (28)                |
| ADCY6                 | directly catalyzes the formation of     | cAMP                  | (28)                |
| CALM                  | directly activates                      | MYLK                  | (8)                 |
| CALM                  | directly activates                      | PDE1                  | (6)                 |
| CALM                  | directly activates                      | ADCY3                 | (14)                |
| CALM                  | hypothetically activates                | PI3K                  | Present study       |
| cAMP                  | directly inhibits                       | PRKAR                 | (13)                |
| cAMP                  | directly activates                      | RAPGEF3               | (10)                |
| cAMP                  | hypothetically activates                | PDK2                  | Present study, (18) |
| MYLK                  | directly activates                      | MRLCB                 | (23)                |
| PDE1                  | directly degrades                       | cAMP                  | (3)                 |
| PDE4                  | directly degrades                       | cAMP                  | (3)                 |
| PRKAR                 | directly inhibits                       | PRKAC                 | (13)                |
| PRKAC                 | directly activates                      | AQP2                  | (16)                |
| PRKAC                 | directly inhibits                       | c-Raf                 | Present study, (11) |
| RAPGEF3               | directly activates                      | RAP1                  | (10)                |
| RAP1                  | hypothetically activates                | B-Raf                 | (20)                |
| RAP1                  | hypothetically inhibits                 | c-Raf                 | (21)                |
| MRLCB                 | directly activates                      | MYH9                  | (30)                |
| MRLCB                 | directly activates                      | MYH10                 | (30)                |
| MYH9                  | indirectly activates the trafficking of | AQP2                  | (8)                 |
| MYH10                 | indirectly activates the trafficking of | AQP2                  | (8)                 |
| c-Raf                 | directly activates                      | MEK1/2                | (7)                 |
| B-Raf                 | hypothetically activates                | MEK1/2                | (7)                 |
| MEK1/2                | directly activates                      | ERK1/2                | (19)                |



|                 |                      |                 |                     |
|-----------------|----------------------|-----------------|---------------------|
| PI3K            | directly activates   | PDK1            | (1)                 |
| PI3K            | directly activates   | PDK2            | (5)                 |
| PDK1            | directly activates   | AKT             | (1)                 |
| PDK2            | directly activates   | AKT             | (5)                 |
| Hyperosmolality | indirectly activates | PI3K            | Present study, (15) |
| Hyperosmolality | indirectly activates | p38 MAPK        | Present study, (22) |
| AQP2            | directly activates   | Water transport | (12)                |

#### Reference List

1. **Alessi DR, James SR, Downes CP, Holmes AB, Gaffney PR, Reese CB and Cohen P.** Characterization of a 3-phosphoinositide-dependent protein kinase which phosphorylates and activates protein kinase Balpha. *Curr Biol* 7: 261-269, 1997.
2. **Bockaert J, Roy C, Rajerison R and Jard S.** Specific binding of [<sup>3</sup>H]lysine-vasopressin to pig kidney plasma membranes. Relationship of receptor occupancy to adenylate cyclase activation. *Journal of Biological Chemistry* 248: 5922-5931, 1973.
3. **Butcher RW and Sutherland EW.** Adenosine 3',5'-phosphate in biological materials. I. Purification and properties of cyclic 3',5'-nucleotide phosphodiesterase and use of this enzyme to characterize adenosine 3',5'-phosphate in human urine. *J Biol Chem* 237: 1244-1250, 1962.
4. **Chabardes D, Firsov D, Aarab L, Clabecq A, Bellanger AC, Siaume-Perez S and Elalouf JM.** Localization of mRNAs encoding Ca<sup>2+</sup>-inhibitable adenylyl cyclases along the renal tubule. Functional consequences for regulation of the cAMP content. *Journal of Biological Chemistry* 271: 19264-19271, 1996.
5. **Chan TO and Tschlis PN.** PDK2: a complex tail in one Akt. *Sci STKE* 2001: E1, 2001.

6. **Cheung WY.** Cyclic 3',5'-nucleotide phosphodiesterase: pronounced stimulation by snake venom. *Biochem Biophys Res Commun* 29: 478-482, 1967.
7. **Chong H, Vikis HG and Guan KL.** Mechanisms of regulating the Raf kinase family. *Cell Signal* 15: 463-469, 2003.
8. **Chou CL, Christensen BM, Frische S, Vorum H, Desai RA, Hoffert JD, de Lanerolle P, Nielsen S and Knepper MA.** Non-muscle myosin II and myosin light chain kinase are downstream targets for vasopressin signaling in the renal collecting duct. *J Biol Chem* 279: 49026-49035, 2004.
9. **Chou CL, Yip KP, Michea L, Kador K, Ferraris J, Wade JB and Knepper MA.** Regulation of aquaporin-2 trafficking by vasopressin in renal collecting duct: Roles of ryanodine-sensitive Ca<sup>2+</sup> stores and calmodulin. *Journal of Biological Chemistry* 275: 36839-36846, 2000.
10. **de RJ, Zwartkruis FJ, Verheijen MH, Cool RH, Nijman SM, Wittinghofer A and Bos JL.** Epac is a Rap1 guanine-nucleotide-exchange factor directly activated by cyclic AMP. *Nature* 396: 474-477, 1998.
11. **Dhillon AS, Pollock C, Steen H, Shaw PE, Mischak H and Kolch W.** Cyclic AMP-dependent kinase regulates Raf-1 kinase mainly by phosphorylation of serine 259. *Mol Cell Biol* 22: 3237-3246, 2002.

12. **Fushimi K, Uchida S, Hara Y, Hirata Y, Marumo F and Sasaki S.** Cloning and expression of apical membrane water channel of rat kidney collecting tubule. *Nature* 361: 549-552, 1993.
13. **Granot J, Mildvan AS and Kaiser ET.** Studies of the mechanism of action and regulation of cAMP-dependent protein kinase. *Arch Biochem Biophys* 205: 1-17, 1980.
14. **Hoffert JD, Chou CL, Fenton RA and Knepper MA.** Calmodulin is required for vasopressin-stimulated increase in cyclic AMP production in inner medullary collecting duct. *J Biol Chem* 280: 13624-13630, 2005.
15. **Irrarrazabal CE, Burg MB, Ward SG and Ferraris JD.** Phosphatidylinositol 3-kinase mediates activation of ATM by high NaCl and by ionizing radiation: Role in osmoprotective transcriptional regulation. *Proc Natl Acad Sci U S A* 103: 8882-8887, 2006.
16. **Kuwahara M, Fushimi K, Terada Y, Bai L, Marumo F and Sasaki S.** cAMP-dependent phosphorylation stimulates water permeability of aquaporin-collecting duct water channel protein expressed in *Xenopus* oocytes. *Journal of Biological Chemistry* 270: 10384-10387, 1995.
17. **Lolait SJ, O'Carroll AM, McBride OW, Konig M, Morel A and Brownstein MJ.** Cloning and characterization of a vasopressin V2 receptor and possible link to nephrogenic diabetes insipidus. *Nature* 357: 336-339, 1992.
18. **Misra UK and Pizzo SV.** Coordinate regulation of forskolin-induced cellular proliferation in macrophages by protein kinase A/cAMP-response element-binding protein (CREB) and

- Epac1-Rap1 signaling: effects of silencing CREB gene expression on Akt activation. *J Biol Chem* 280: 38276-38289, 2005.
19. **Mordret G.** MAP kinase kinase: a node connecting multiple pathways. *Biol Cell* 79: 193-207, 1993.
  20. **Ohtsuka T, Shimizu K, Yamamori B, Kuroda S and Takai Y.** Activation of brain B-Raf protein kinase by Rap1B small GTP-binding protein. *J Biol Chem* 271: 1258-1261, 1996.
  21. **Okada T, Hu CD, Jin TG, Kariya K, Yamawaki-Kataoka Y and Kataoka T.** The strength of interaction at the Raf cysteine-rich domain is a critical determinant of response of Raf to Ras family small GTPases. *Mol Cell Biol* 19: 6057-6064, 1999.
  22. **Padda R, Wamsley-Davis A, Gustin MC, Ross R, Yu C and Sheikh-Hamad D.** MEKK3-mediated signaling to p38 kinase and TonE in hypertonically stressed kidney cells. *Am J Physiol Renal Physiol* 291: F874-F881, 2006.
  23. **Pires E, Perry SV and Thomas MA.** Myosin light-chain kinase, a new enzyme from striated muscle. *FEBS Lett* 41: 292-296, 1974.
  24. **Povsic TJ, Kohout TA and Lefkowitz RJ.** Beta-arrestin1 mediates insulin-like growth factor 1 (IGF-1) activation of phosphatidylinositol 3-kinase (PI3K) and anti-apoptosis. *J Biol Chem* 278: 51334-51339, 2003.

25. **Ren XR, Reiter E, Ahn S, Kim J, Chen W and Lefkowitz RJ.** Different G protein-coupled receptor kinases govern G protein and beta-arrestin-mediated signaling of V2 vasopressin receptor. *Proc Natl Acad Sci U S A* 102: 1448-1453, 2005.
26. **Rodbell M, Birnbaumer L, Pohl SL and Krans HM.** The glucagon-sensitive adenylyl cyclase system in plasma membranes of rat liver. V. An obligatory role of guanylnucleotides in glucagon action. *J Biol Chem* 246: 1877-1882, 1971.
27. **Stoyanov B, Volinia S, Hanck T, Rubio I, Loubtchenkov M, Malek D, Stoyanova S, Vanhaesebroeck B, Dhand R, Nurnberg B and .** Cloning and characterization of a G protein-activated human phosphoinositide-3 kinase. *Science* 269: 690-693, 1995.
28. **Sutherland EW, RALL TW and MENON T.** Adenylyl cyclase. I. Distribution, preparation, and properties. *J Biol Chem* 237: 1220-1227, 1962.
29. **Tang X, Batty IH and Downes CP.** Muscarinic receptors mediate phospholipase C-dependent activation of protein kinase B via Ca<sup>2+</sup>, ErbB3, and phosphoinositide 3-kinase in 1321N1 astrocytoma cells. *J Biol Chem* 277: 338-344, 2002.
30. **Taubman MB, Grant JW and Nadal-Ginard B.** Cloning and characterization of mammalian myosin regulatory light chain (RLC) cDNA: the RLC gene is expressed in smooth, sarcomeric, and nonmuscle tissues. *J Cell Biol* 104: 1505-1513, 1987.
31. **Wallace RW and Cheung WY.** Calmodulin. Production of an antibody in rabbit and development of a radioimmunoassay. *J Biol Chem* 254: 6564-6571, 1979.

32. **Zalk R, Lehnart SE and Marks AR.** Modulation of the ryanodine receptor and intracellular calcium. *Annu Rev Biochem* 76: 367-385, 2007.
